# Supplementary material
Source: PubMed Central journal article supplement (PMC3035067)
Supplement: blood-2010-07-293795_1.pdf [file blood-2010-07-293795_1.pdf]

| <b>Table S1. Patient and graft characteristics of Treg and 108 historical control patients</b> |                |                     |            |
|------------------------------------------------------------------------------------------------|----------------|---------------------|------------|
|                                                                                                | Treg           | Historical Controls | p-value    |
| <b>Number of patients</b>                                                                      | 23             | 108                 | NA         |
| <b>Age in years<br/>Median (range)</b>                                                         | 52 (25–68)     | 51 (6-69)           | .18        |
| <b>Weight in kg<br/>Median (range)</b>                                                         | 77 (50–133)    | 79 (22-145)         | .54        |
| <b>TNC (<math>\times 10^7/\text{kg}</math>)<br/>Median (range)</b>                             | 4.1 (2.4–10.0) | 3.7 (1.5-8.2)       | .15        |
| <b>CD34 (<math>\times 10^5/\text{kg}</math>)<br/>Median (range)</b>                            | 5.0 (2.3–10.7) | 5.2 (1.1-15.4)      | .44        |
| <b>CD3 (<math>\times 10^7/\text{kg}</math>)<br/>Median (range)</b>                             | 1.6 (0.9–3.6)  | 1.3 (0.2-3.1)       | <b>.01</b> |
| <b>Gender</b>                                                                                  |                |                     | .21        |
| Male                                                                                           | 11 (48%)       | 67 (62%)            |            |
| <b>Patient CMV status</b>                                                                      |                |                     | .09        |
| Negative                                                                                       | 14 (61%)       | 45 (42%)            |            |
| Positive                                                                                       | 9 (39%)        | 63 (58%)            |            |
| <b>HLA (donor #1+donor#2)</b>                                                                  |                |                     | .09        |
| 4/6 + 4/6                                                                                      | 3 (13%)        | 36 (33%)            |            |
| 4/6 + 5/6                                                                                      | 6 (26%)        | 29 (27%)            |            |
| 4/6 + 6/6                                                                                      | 0              | 3 (3%)              |            |
| 5/6 + 5/6                                                                                      | 8 (35%)        | 32 (30%)            |            |
| 5/6 + 6/6                                                                                      | 3 (13%)        | 4 (4%)              |            |
| 6/6 + 6/6                                                                                      | 3 (13%)        | 4 (4%)              |            |
| <b>Diagnosis</b>                                                                               |                |                     | .43        |
| ALL                                                                                            | 3 (13%)        | 14 (13%)            |            |
| AML                                                                                            | 8 (35%)        | 34 (31%)            |            |
| CML                                                                                            | 0              | 3 (3%)              |            |
| Other Leukemia                                                                                 | 4 (17%)        | 6 (6%)              |            |
| MDS                                                                                            | 0              | 3 (3%)              |            |
| NHL                                                                                            | 7 (30%)        | 26 (24%)            |            |
| Hodgkin's Lymphoma                                                                             | 1 (4%)         | 19 (18%)            |            |
| Myeloproliferative Disease                                                                     | 0              | 3 (3%)              |            |

Treg, regulatory T-cells; TNC, total nucleated cell dose; CMV, cytomegalovirus; HLA, human leukocyte antigen; ALL, acute lymphoblastic leukemia; AML, acute myeloid leukemia; CML, chronic myeloid leukemia; MDS, myelodysplastic syndrome; NHL, non-Hodgkin's lymphoma.

# Phase I treatment plan UCB-derived regulatory T Cells

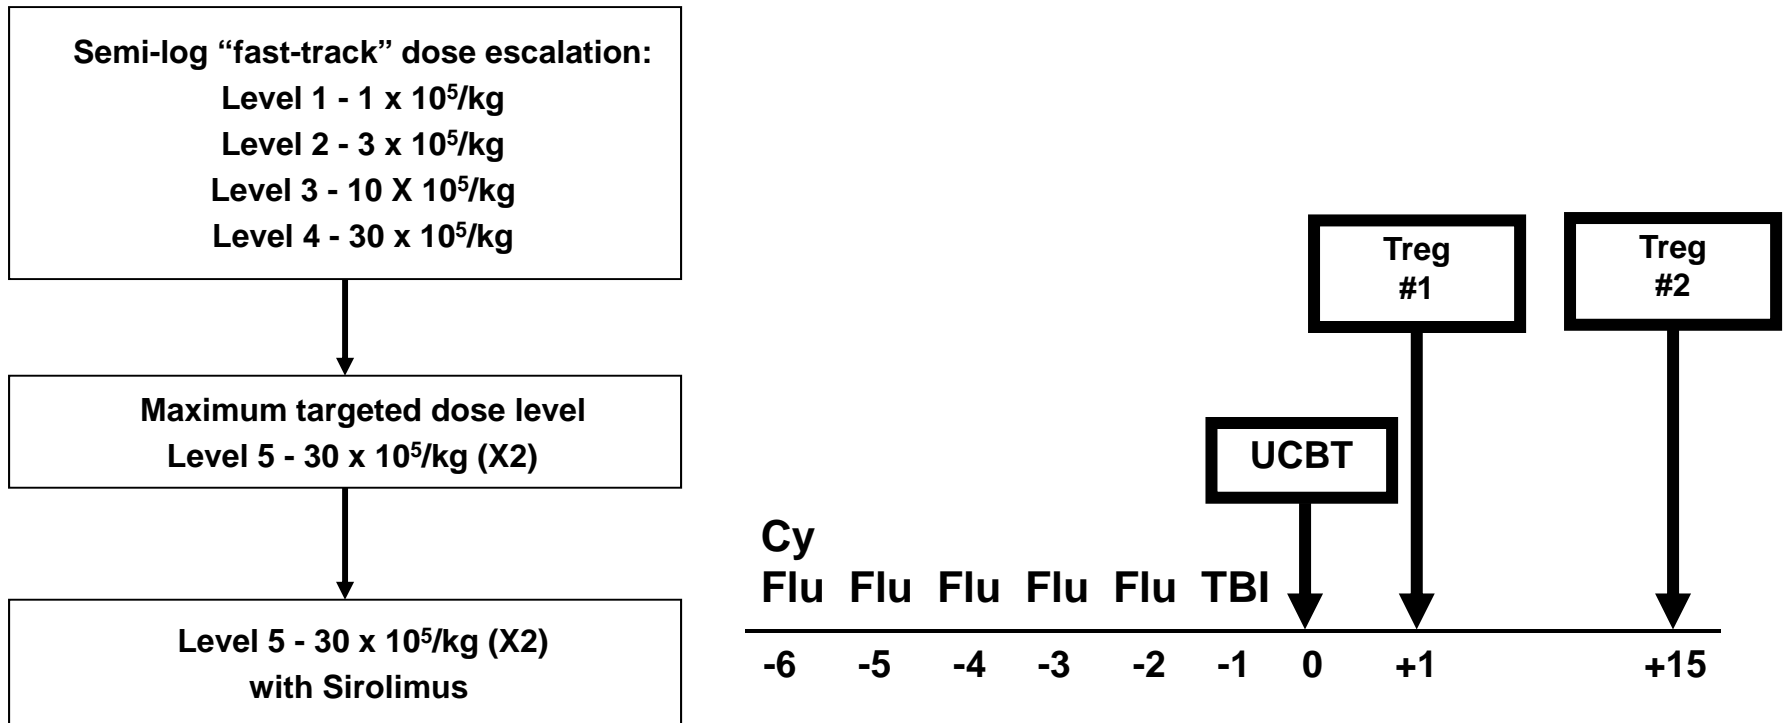

Figure S1. Treatment strategy and dose escalation in the protocol

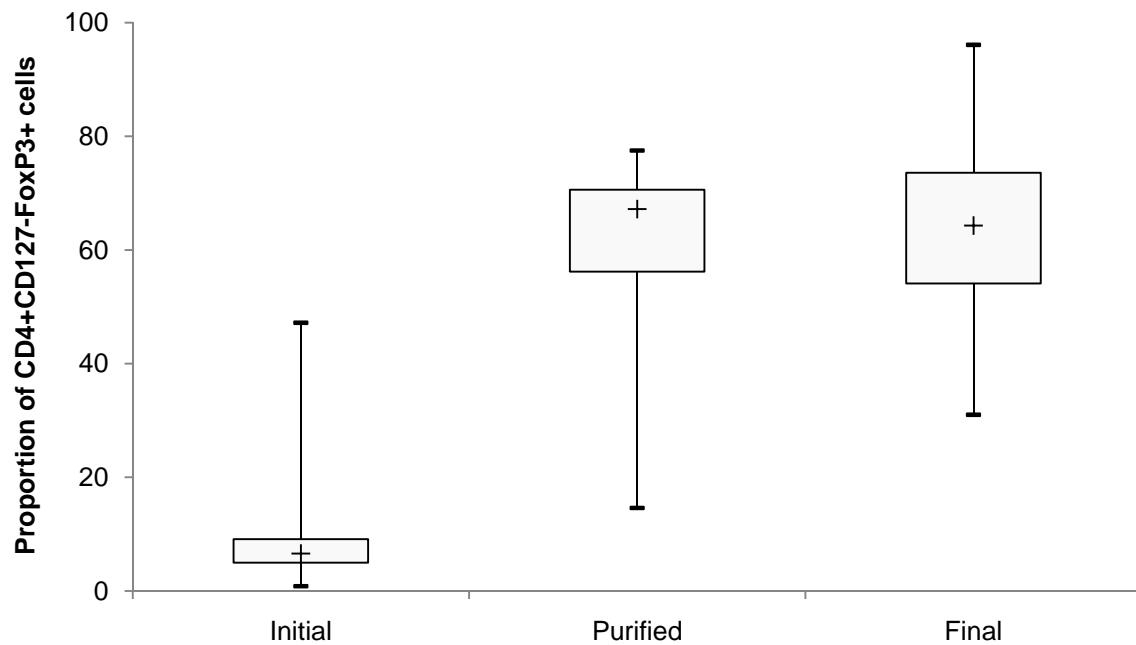

**Figure S2. Proportion of CD4+CD127-FoxP3+ cells before and after CD25+ selection and at the end of the expansion culture period**
